# Supplementary material
Source: PubMed Central journal article supplement (PMC5288744)
Supplement: jnm175273SupplementaryData.pdf [file jnm175273SupplementaryData.pdf]

Supplemental Table 1 – Temporal Stability

| stop time<br>(min) | SRTM BP <sub>ND</sub><br>(0-stop time) / (0-150) | SRTM2 BP <sub>ND</sub><br>(0-stop time) / (0-150) | DVR-1<br>(30-stop time) / (30-150) |
|--------------------|--------------------------------------------------|---------------------------------------------------|------------------------------------|
| 50                 | 0.78±0.07                                        | 0.77±0.28                                         | 0.91±0.14                          |
| 60                 | 0.82±0.06                                        | 0.79±0.17                                         | 0.91±0.11                          |
| 70                 | 0.85±0.05                                        | 0.82±0.11                                         | 0.91±0.08                          |
| 75                 | 0.86±0.05                                        | 0.83±0.09                                         | 0.91±0.07                          |
| 80                 | 0.88±0.04                                        | 0.85±0.07                                         | 0.91±0.07                          |
| 85                 | 0.89±0.04                                        | 0.86±0.07                                         | 0.92±0.07                          |
| 90                 | 0.90±0.04                                        | 0.87±0.06                                         | 0.92±0.06                          |
| 95                 | 0.91±0.03                                        | 0.88±0.05                                         | 0.92±0.06                          |
| 100                | 0.92±0.03                                        | 0.89±0.05                                         | 0.95±0.05                          |
| 125                | 0.94±0.02                                        | 0.92±0.04                                         | 0.97±0.04                          |
| 130                | 0.95±0.02                                        | 0.95±0.03                                         | 0.98±0.03                          |
| 135                | 0.97±0.01                                        | 0.97±0.02                                         | 0.99±0.02                          |
| 140                | 0.98±0.01                                        | 0.98±0.01                                         | 0.99±0.02                          |
| 145                | 0.99±0                                           | 0.99±0.01                                         | 1±0.01                             |

Legend – Temporal stability of SRTM, SRTM2 BP<sub>ND</sub> and DVR-1 was examined within 15 AD subjects for PCING, precuneus, OCC, PAR and TEMP. Ratios of shorter scan to full scan were taken, mean ± standard deviation reported.

Supplemental Table 2

|                     | Logan DVR                                              | SRTM R <sub>1</sub>                                    | SRTM2 R <sub>1</sub>                                   |
|---------------------|--------------------------------------------------------|--------------------------------------------------------|--------------------------------------------------------|
| Anterior cingulate  | AD: 1.23 ± 0.28<br>HC: 1.02 ± 0.09<br>yHC: 0.99 ± 0.05 | AD: 0.91 ± 0.06<br>HC: 0.86 ± 0.09<br>yHC: 0.96 ± 0.05 | AD: 0.90 ± 0.05<br>HC: 0.86 ± 0.09<br>yHC: 0.99 ± 0.05 |
| Brainstem           | AD: 0.84 ± 0.10<br>HC: 0.90 ± 0.07<br>yHC: 0.85 ± 0.11 | AD: 0.73 ± 0.05<br>HC: 0.77 ± 0.05<br>yHC: 0.80 ± 0.04 | AD: 0.74 ± 0.05<br>HC: 0.77 ± 0.05<br>yHC: 0.81 ± 0.04 |
| Entorhinal cortex   | AD: 1.45 ± 0.30<br>HC: 0.99 ± 0.10<br>yHC: 1.00 ± 0.07 | AD: 0.64 ± 0.05<br>HC: 0.65 ± 0.05<br>yHC: 0.73 ± 0.02 | AD: 0.66 ± 0.04<br>HC: 0.64 ± 0.05<br>yHC: 0.78 ± 0.06 |
| Frontal cortex      | AD: 1.46 ± 0.30<br>HC: 1.07 ± 0.10<br>yHC: 1.00 ± 0.09 | AD: 0.92 ± 0.05<br>HC: 0.96 ± 0.08<br>yHC: 1.02 ± 0.03 | AD: 0.90 ± 0.05<br>HC: 0.96 ± 0.08<br>yHC: 1.02 ± 0.03 |
| Hippocampus         | AD: 1.19 ± 0.18<br>HC: 1.12 ± 0.07<br>yHC: 0.92 ± 0.10 | AD: 0.75 ± 0.06<br>HC: 0.81 ± 0.06<br>yHC: 0.85 ± 0.05 | AD: 0.77 ± 0.06<br>HC: 0.82 ± 0.06<br>yHC: 0.88 ± 0.04 |
| Occipital cortex    | AD: 2.11 ± 0.51<br>HC: 1.04 ± 0.11<br>yHC: 1.07 ± 0.10 | AD: 0.85 ± 0.15<br>HC: 0.91 ± 0.09<br>yHC: 0.96 ± 0.04 | AD: 0.84 ± 0.13<br>HC: 0.90 ± 0.09<br>yHC: 0.95 ± 0.03 |
| Parietal cortex     | AD: 2.26 ± 0.61<br>HC: 1.08 ± 0.10<br>yHC: 1.02 ± 0.10 | AD: 0.84 ± 0.08<br>HC: 0.97 ± 0.08<br>yHC: 1.02 ± 0.02 | AD: 0.85 ± 0.08<br>HC: 0.98 ± 0.08<br>yHC: 1.03 ± 0.01 |
| Posterior cingulate | AD: 1.85 ± 0.62<br>HC: 1.10 ± 0.09<br>yHC: 1.04 ± 0.07 | AD: 0.99 ± 0.07<br>HC: 1.02 ± 0.09<br>yHC: 1.13 ± 0.03 | AD: 0.97 ± 0.07<br>HC: 1.02 ± 0.10<br>yHC: 1.12 ± 0.03 |
| Precuneus           | AD: 2.22 ± 0.65                                        | AD: 0.95 ± 0.08                                        | AD: 0.95 ± 0.08                                        |

|                 |                                                        |                                                        |                                                        |
|-----------------|--------------------------------------------------------|--------------------------------------------------------|--------------------------------------------------------|
|                 | HC: 1.13 ± 0.09<br>yHC: 1.03 ± 0.09                    | HC: 1.11 ± 0.08<br>yHC: 1.16 ± 0.04                    | HC: 1.11 ± 0.08<br>yHC: 1.15 ± 0.02                    |
| Temporal cortex | AD: 2.29 ± 0.63<br>HC: 1.12 ± 0.14<br>yHC: 1 ± 0.08    | AD: 0.79 ± 0.09<br>HC: 0.88 ± 0.08<br>yHC: 0.94 ± 0.05 | AD: 0.82 ± 0.09<br>HC: 0.90 ± 0.08<br>yHC: 0.95 ± 0.03 |
| Caudate         | AD: 0.87 ± 0.14<br>HC: 1.10 ± 0.14<br>yHC: 0.85 ± 0.13 | AD: 0.69 ± 0.10<br>HC: 0.82 ± 0.11<br>yHC: 0.94 ± 0.02 | AD: 0.74 ± 0.11<br>HC: 0.87 ± 0.12<br>yHC: 0.96 ± 0.02 |
| Pallidum        | AD: 1.28 ± 0.18<br>HC: 1.38 ± 0.13<br>yHC: 0.96 ± 0.12 | AD: 0.87 ± 0.08<br>HC: 0.86 ± 0.09<br>yHC: 0.82 ± 0.10 | AD: 0.94 ± 0.08<br>HC: 0.90 ± 0.10<br>yHC: 0.88 ± 0.07 |
| Putamen         | AD: 1.42 ± 0.17<br>HC: 1.41 ± 0.12<br>yHC: 0.96 ± 0.11 | AD: 1.15 ± 0.08<br>HC: 1.12 ± 0.09<br>yHC: 1.11 ± 0.07 | AD: 1.21 ± 0.08<br>HC: 1.18 ± 0.09<br>yHC: 1.15 ± 0.06 |
| Thalamus        | AD: 1.09 ± 0.14<br>HC: 1.19 ± 0.10<br>yHC: 0.98 ± 0.11 | AD: 0.94 ± 0.08<br>HC: 1.00 ± 0.10<br>yHC: 1.05 ± 0.07 | AD: 1.00 ± 0.09<br>HC: 1.03 ± 0.10<br>yHC: 1.08 ± 0.05 |

Legend - Mean ± standard deviation of DVR, SRTM R1 and SRTM2 R1 of ADs, HCs, and yHCs.

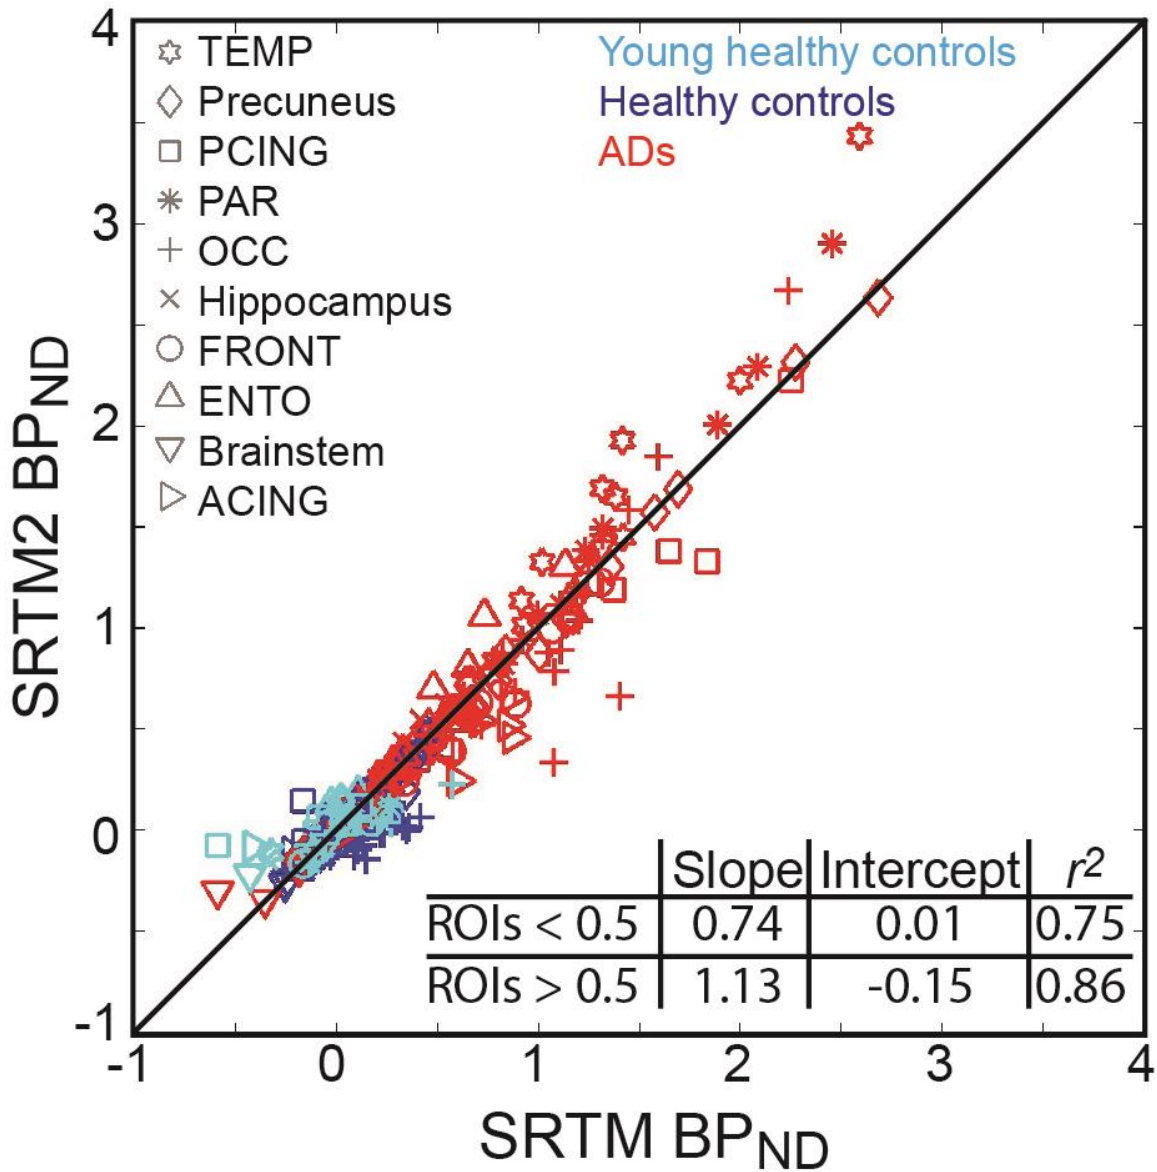

Supplemental Figure 1: SRTM  $BP_{ND}$  versus SRTM2  $BP_{ND}$ , in 43 subjects (yHCs: light blue, HCs: blue, ADs: red) for 10 ROIs (FRONT, PAR, OCC, TEMP, ENTO, brainstem, ACING, PCING, hippocampus, precuneus)

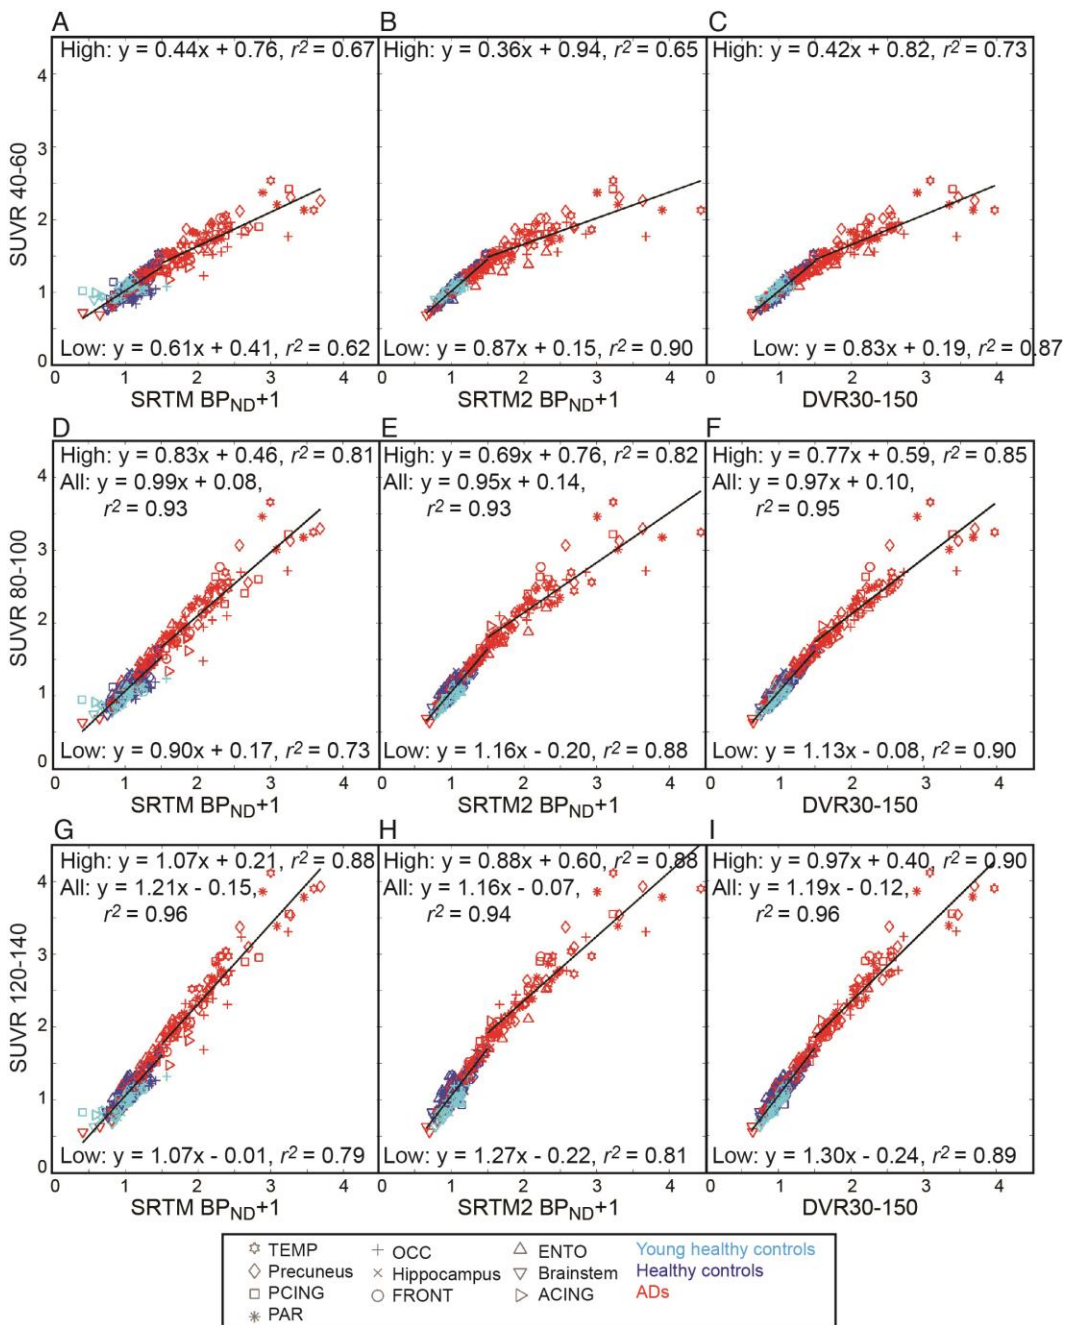

Supplemental Figure 2: Shows relationship between reference standards and SUVR40-60, SUVR80-100 and SUVR120-140 for 10 ROIs in yHC, HC and ADs. Results from linear regression fits between reference standards and SUVRs for lROIs and hROIs are shown in black.

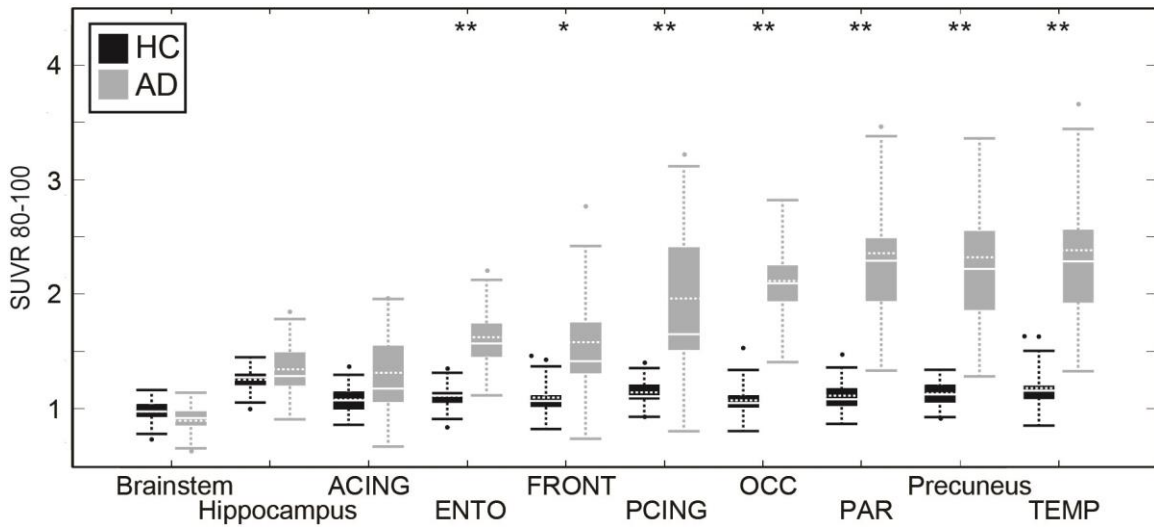

Supplemental Figure 3: Welch's *t*-test between HCs and ADs in SUVR80-100. Boundaries of boxes represents 25<sup>th</sup>-75<sup>th</sup> percentile, solid horizontal white line is median, dashed horizontal white line is mean, dashed vertical line 5<sup>th</sup> to 95<sup>th</sup> percentiles. \*\* denotes  $p < 0.001$  and \* denotes  $p < 0.01$ , Bonferroni corrected.
